# Supplementary material for: Stable cascade dual Z-scheme SnC/arsenene/HfS 2 trilayer heterojunction for high-efficiency photocatalytic water splitting: a first-principles study
Source: Royal Society of Chemistry journal article supplement (doi:10.1039/d5cp03175c), 2025-01-01
Supplement: d5cp03175c1.pdf [file d5cp03175c1.pdf]

## Supporting information

# **Stable Cascade Dual Z-Scheme SnC/Arsenene/HfS<sub>2</sub> Trilayer Heterojunction for High-Efficiency Photocatalytic Water Splitting: A First-Principles Study**

Zhengdong Sun<sup>a</sup>, Jiaxin Ma<sup>a</sup>, Junhao Zhu<sup>a</sup>, Yifei Shen<sup>a</sup>, Zhuyuan Shen<sup>a</sup>, Yiqing Liu<sup>a</sup>, Weide Liu<sup>a</sup>,  
Minwei Zhang<sup>a</sup>, Meng Zhang<sup>\*a</sup>

<sup>a</sup> School of Physics, East China University of Science and Technology, Shanghai 200237.

\* Corresponding author: E-mail: mzhang@ecust.edu.cn (M. Zhang)

## **1. Structural Parameters of Different Stacking Configurations for Two Trilayer Heterojunctions**

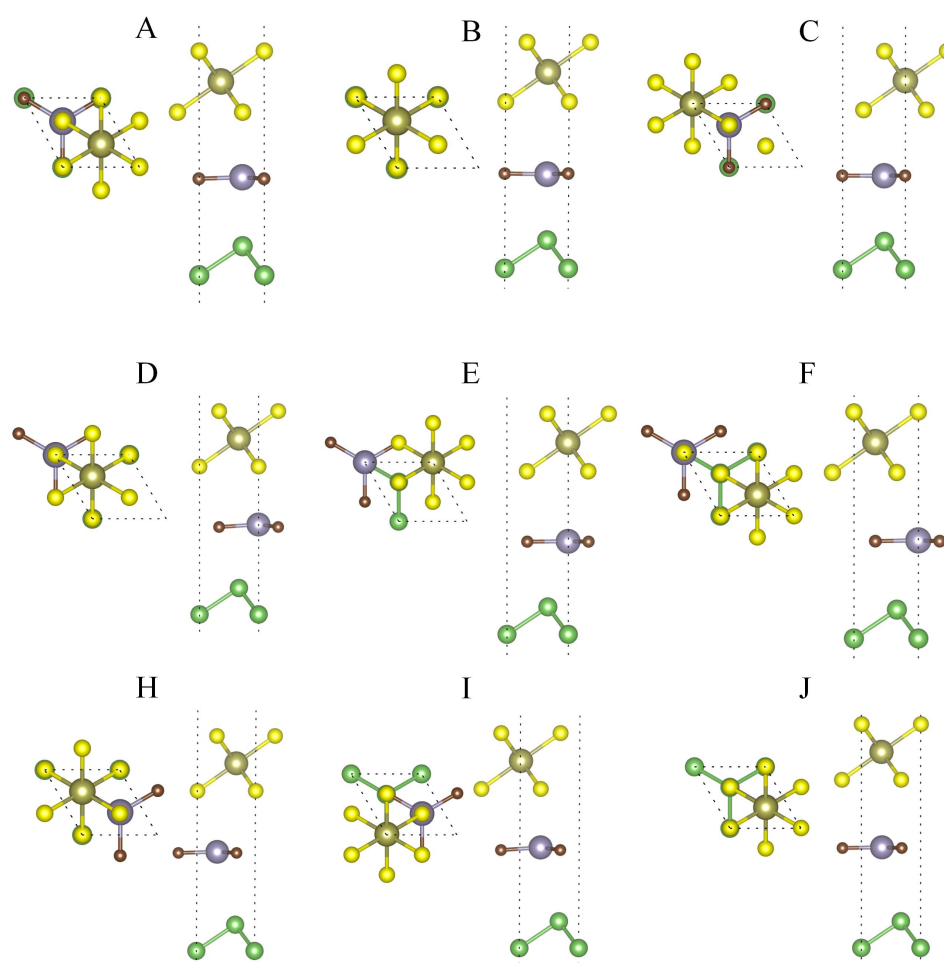

Fig. S1. Top and side views of the nine stacking configurations for the HfS<sub>2</sub>/SnC/arsenene heterojunction. Each configuration corresponds to a distinct relative lateral displacement among the three monolayers.

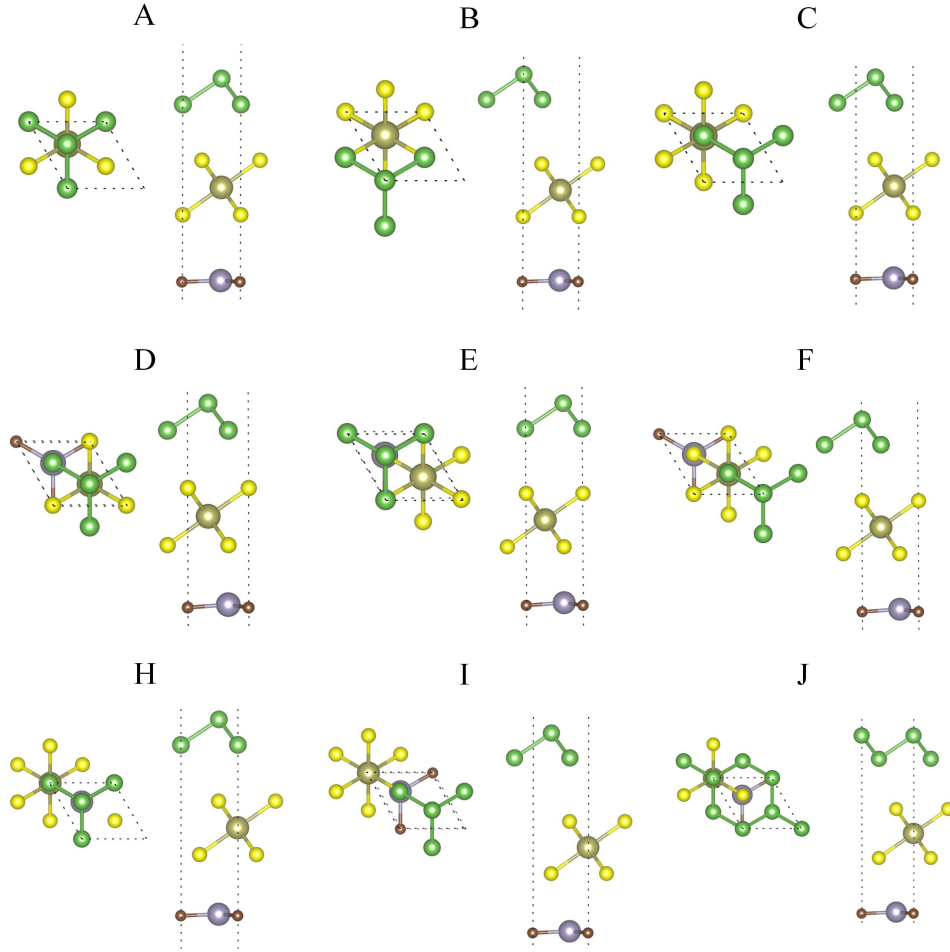

Fig. S2. Top and side views of the nine stacking configurations for the arsenene/HfS<sub>2</sub>/SnC heterojunction.

Table S1. Calculated lattice constants, interlayer spacings, and binding energies of the HfS<sub>2</sub>/SnC/arsenene heterojunction in different stacking configurations. Notes:  $d_{\text{HfS}_2\text{-SnC}}$  and  $d_{\text{SnC-arsenene}}$  represent the interlayer distances between adjacent monolayers.

| Configurations | Lattice (Å) | $d_{\text{HfS}_2\text{-SnC}}$ (Å) | $d_{\text{SnC-arsenene}}$ (Å) | $E_b$ (eV) |
|----------------|-------------|-----------------------------------|-------------------------------|------------|
| A              | 3.606       | 3.119                             | 3.308                         | -1.170     |
| B              | 3.605       | 3.569                             | 3.242                         | -1.084     |
| C              | 3.606       | 3.276                             | 3.271                         | -1.138     |
| D              | 3.603       | 3.067                             | 3.360                         | -1.154     |
| E              | 3.602       | 3.557                             | 3.338                         | -1.058     |
| F              | 3.603       | 3.275                             | 3.344                         | -1.116     |
| H              | 3.598       | 3.248                             | 3.889                         | -1.039     |
| I              | 3.598       | 3.073                             | 3.877                         | -1.079     |
| J              | 3.597       | 3.556                             | 3.896                         | -0.980     |

Table S2. Calculated lattice constants, interlayer spacings, and binding energies of the arsenene/HfS<sub>2</sub>/SnC heterojunction in different stacking configurations.

| Configurations | lattice (Å) | d <sub>arsenene-HfS<sub>2</sub></sub> (Å) | d <sub>HfS<sub>2</sub>-SnC</sub> (Å) | E <sub>b</sub> (eV) |
|----------------|-------------|-------------------------------------------|--------------------------------------|---------------------|
| A              | 3.597       | 3.001                                     | 3.532                                | -1.063              |
| B              | 3.595       | 3.581                                     | 3.542                                | -0.983              |
| C              | 3.597       | 3.103                                     | 3.555                                | -1.048              |
| D              | 3.598       | 2.965                                     | 3.060                                | -1.163              |
| E              | 3.596       | 3.557                                     | 3.086                                | -1.084              |
| F              | 3.598       | 3.092                                     | 3.086                                | -1.147              |
| H              | 3.598       | 3.081                                     | 3.268                                | -1.107              |
| I              | 3.597       | 3.575                                     | 3.238                                | -1.043              |
| J              | 3.598       | 3.007                                     | 3.240                                | -1.123              |

## 2. Stability Analysis of Trilayer Heterojunctions

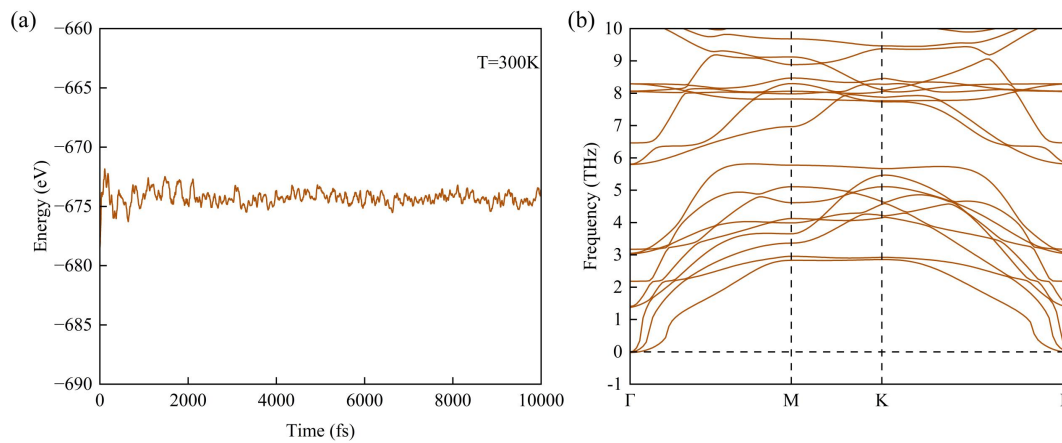

Fig. S3. (a) Total potential energy evolution of the HfS<sub>2</sub>/SnC/arsenene heterojunction during ab initio molecular dynamics (AIMD) simulation at 300 K over 10 ps. (b) Phonon dispersion spectrum confirming dynamic stability of the same configuration.

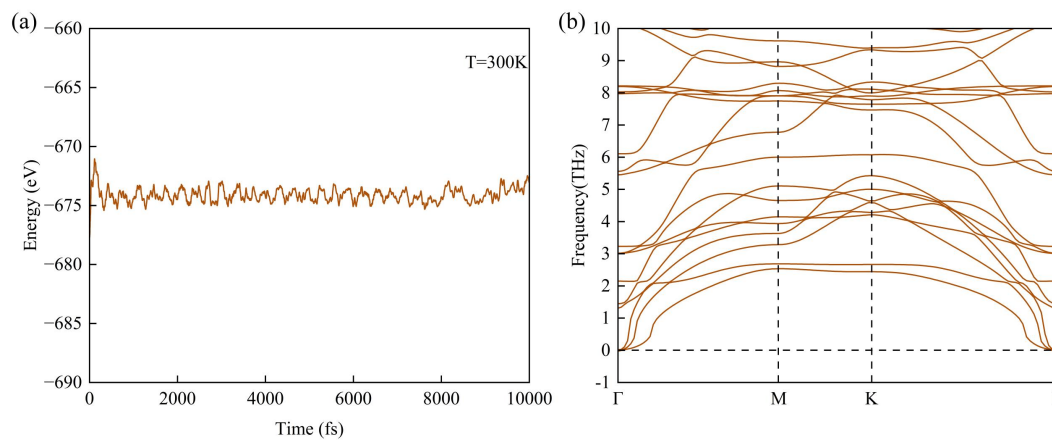

Fig. S4.(a) AIMD simulation showing the total energy variation of the arsenene/HfS<sub>2</sub>/SnC heterojunction at 300 K. (b) Corresponding phonon spectrum confirming dynamic stability without imaginary frequencies.

### 3. Adsorption Configurations of HER and OER Intermediates

To eliminate spurious periodic interactions,  $4\times 4$  supercells were constructed for the three heterojunctions, and adsorption configurations for key intermediates in the hydrogen and oxygen evolution reactions were simulated.

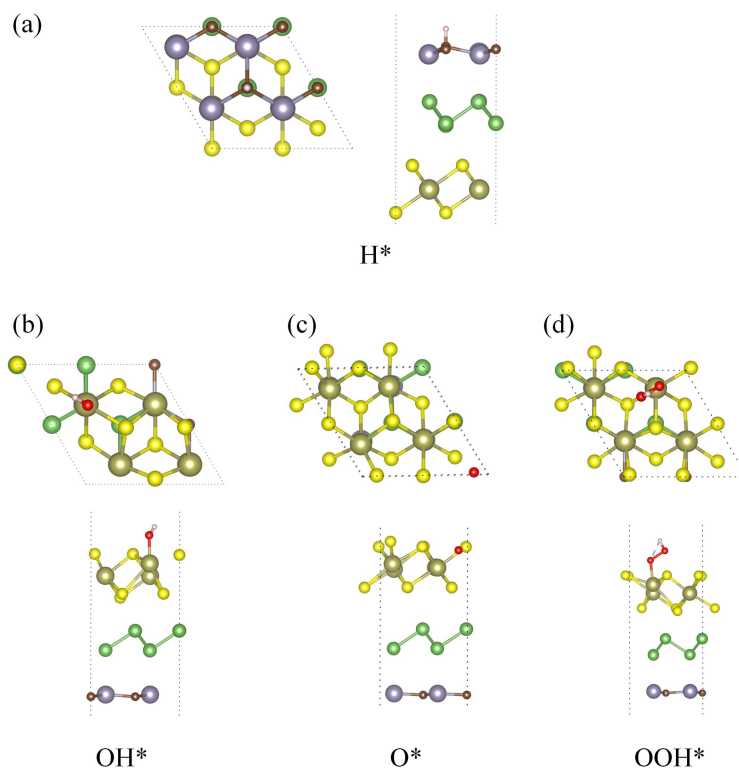

Fig. S5. Adsorbed intermediate configurations in the cascade dual Z-scheme SnC/arsenene/HfS<sub>2</sub> heterojunction: (a) hydrogen evolution reaction (HER); (b) oxygen evolution reaction (OER).

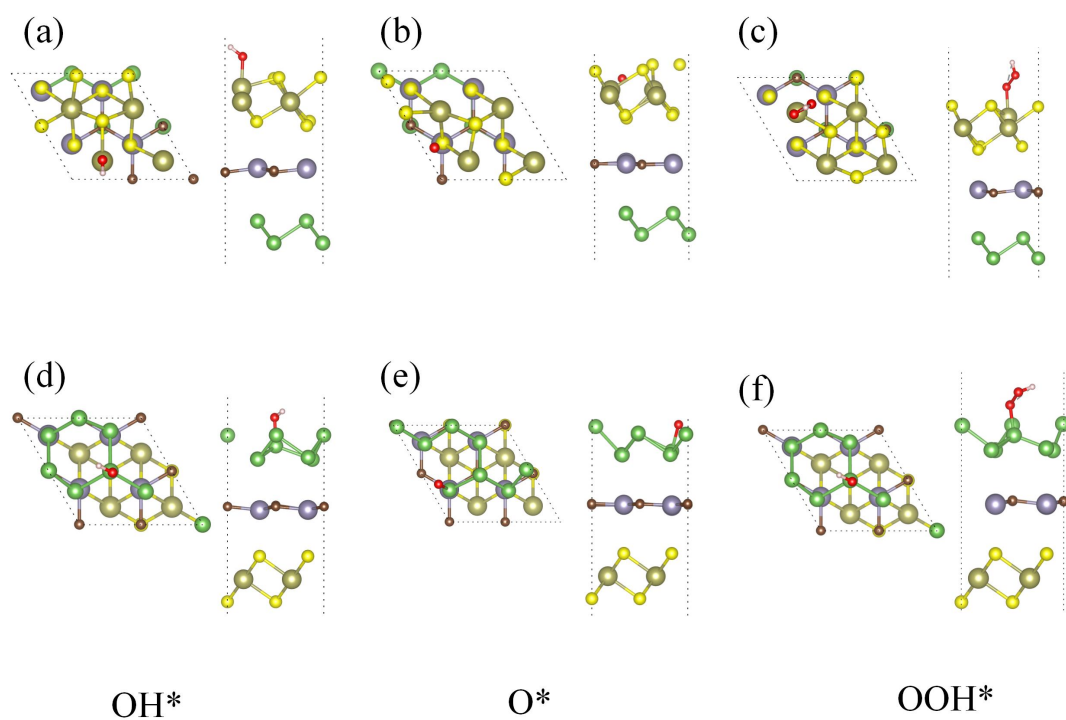

Fig. S6. OER intermediate adsorption configurations for the arrow-up dual Z-scheme  $\text{HfS}_2/\text{SnC}/\text{arsenene}$  heterojunction: (a–c) adsorption on the  $\text{HfS}_2$  side; (d–f) adsorption on the arsenene side.

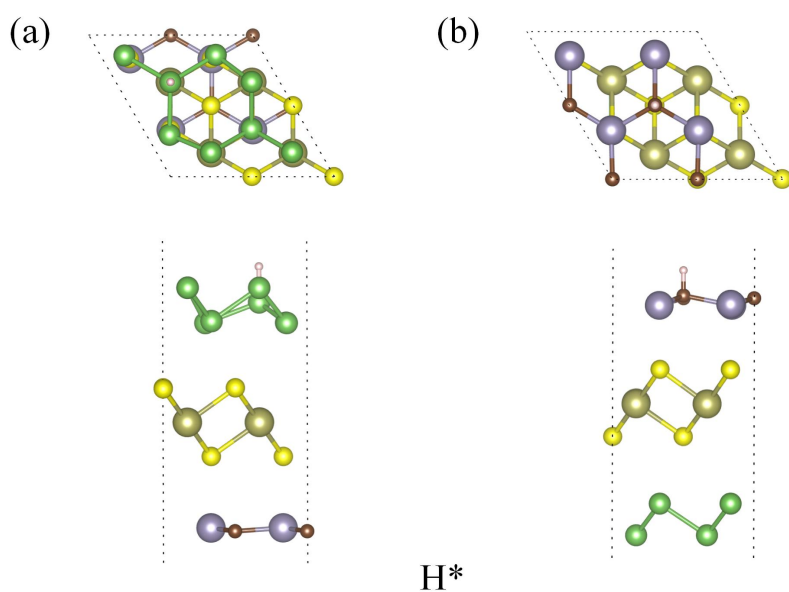

Fig. S7. HER intermediate adsorption configurations in the arrow-down dual Z-scheme  $\text{arsenene}/\text{HfS}_2/\text{SnC}$  heterojunction: (a) arsenene side; (b)  $\text{SnC}$  side.

## 4. Gibbs free energy step diagram for HER and OER

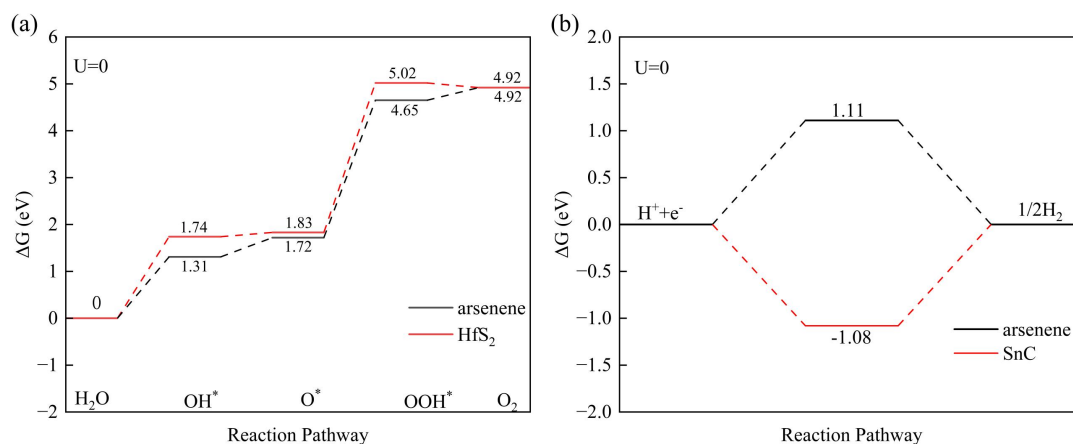

Fig. S8. The Gibbs free energy steps of (a) the reduction reaction on the arsenene side and HfS<sub>2</sub> side and (b) the oxidation reaction on the arsenene side and SnC side in arrow-up dual Z-scheme HfS<sub>2</sub>/SnC/arsenene heterojunction and arrow-down dual Z-scheme SnC/arsenene/HfS<sub>2</sub> heterojunction, respectively.

## 5. Optical Properties of Trilayer Heterojunctions

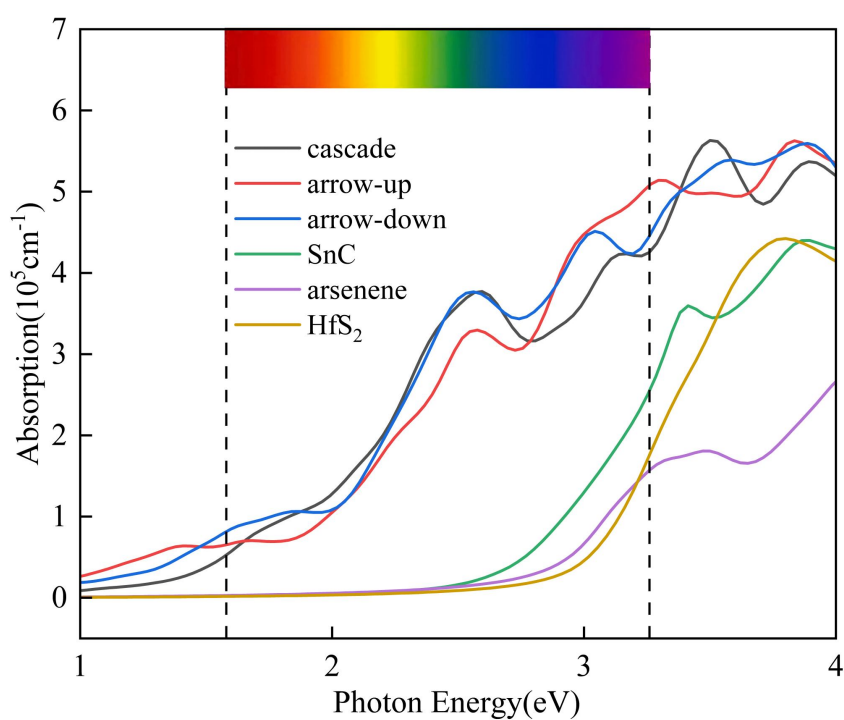

Fig. S9. Optical absorption spectra of monolayer SnC, arsenene, and HfS<sub>2</sub>, as well as the cascade, arrow-up, and arrow-down SnC/arsenene/HfS<sub>2</sub> trilayer heterojunctions studied in this work.
